# Supplementary material for: Serotonergic system antagonists target breast tumor initiating cells and synergize with chemotherapy to shrink human breast tumor xenografts
Source: PubMed Central journal article supplement (PMC5458271; doi:10.18632/oncotarget.16646), 2017-03-29
Supplement: oncotarget-08-32101-s001.pdf [file oncotarget-08-32101-s001.pdf]

# Serotonergic system antagonists target breast tumor initiating cells and synergize with chemotherapy to shrink human breast tumor xenografts

## SUPPLEMENTARY FIGURES AND TABLE

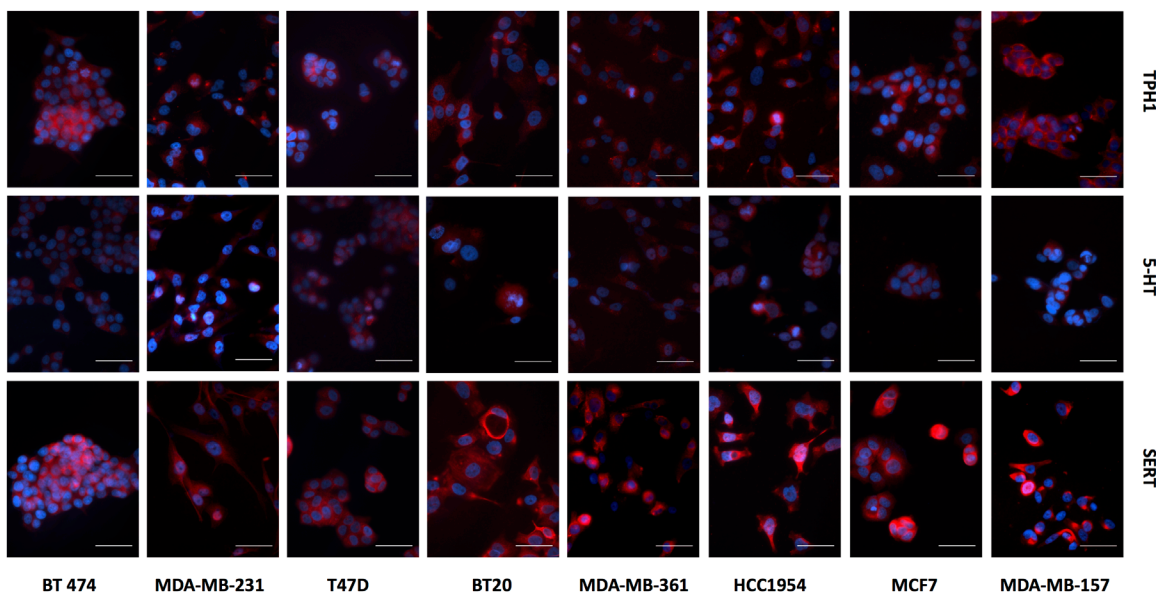

**Supplementary Figure 1: Human breast tumor cell lines synthesize 5-HT, and express both TPH1 and SERT.** Cells grown as adherent cultures in serum-containing medium were fixed and incubated with antibodies that specifically bind to TPH1, 5-HT and SERT. Immunofluorescence imaging reveals expression of TPH1, 5-HT and SERT in the majority of the cells of each breast tumor cell line.

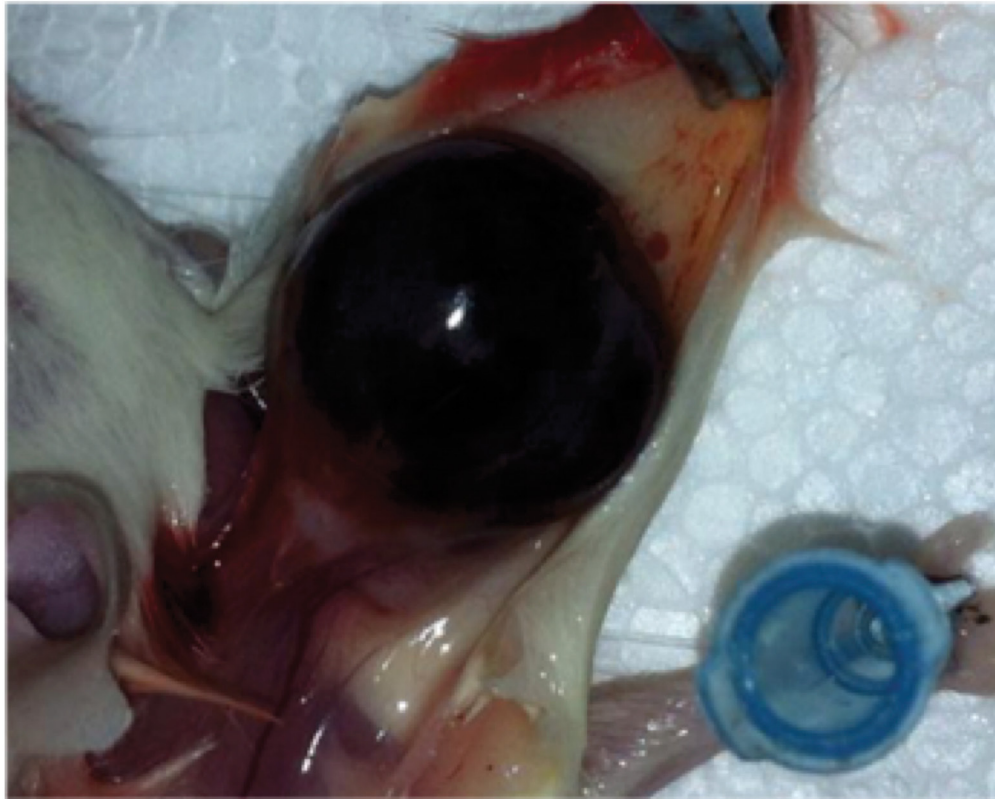

**Supplementary Figure 2: A blood-filled residual tumor xenograft remaining after exposure of mice to the combination of vilazodone and docetaxel.**

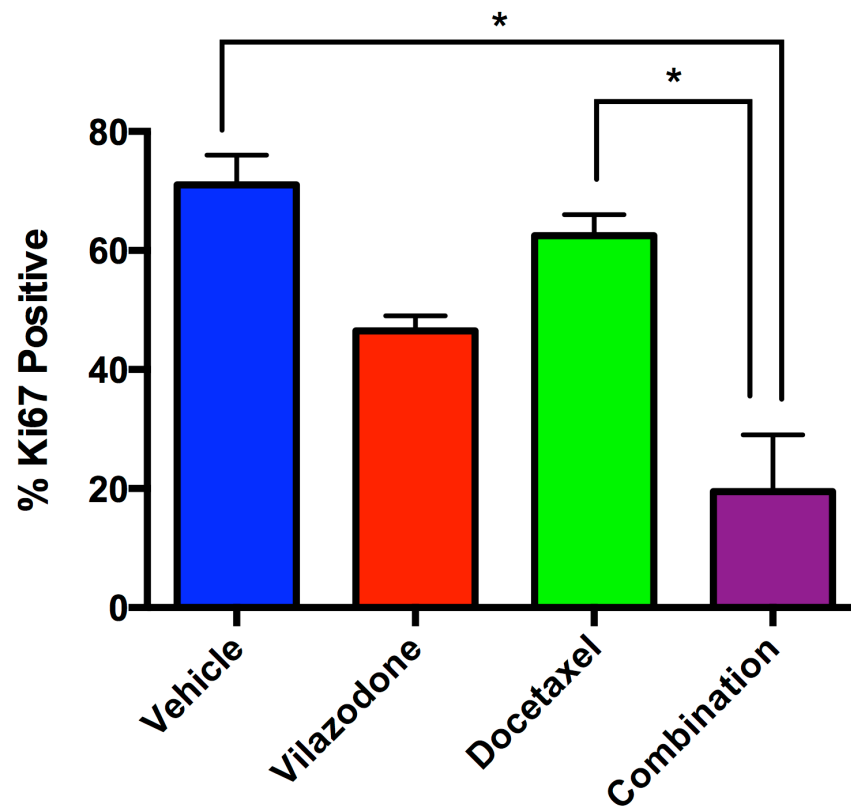

**Supplementary Figure 3: Vilazodone in combination with docetaxel reduced the frequency of proliferating cells to a greater extent than did either compound individually.** Sections of residual tumor xenografts remaining after drug treatment were stained with antibodies to Ki67. The fraction of Ki67-positive cells was calculated in two independent tumor xenografts from each treatment cohort and expressed as a percentage of all the tumor cells. *P*-values ( $P = 0.01$ ) were calculated using one-way ANOVA.

**Supplementary Table 1: Subtype of human breast tumor cell lines**

| Cell Line  | Molecular Subtype | ER | PR | HER2 |
|------------|-------------------|----|----|------|
| HCC1954    | Basal A           | -  | -  | +    |
| MCF7       | Luminal A         | +  | +  |      |
| ZR751      | Luminal A         | +  | +  |      |
| MDA MB 157 | Basal B           | -  | -  |      |
| MDA MB 453 | Luminal B         | -  | -  | -    |
| BT474      | Luminal B         | +  | +  | +    |
| BT20       | Basal A           | -  | -  |      |
| MDA MB 361 | Luminal A         | +  | +  | +    |
| T47D       | Luminal A         | +  | +  |      |
| BT549      | Basal B           | -  | -  |      |

The molecular and clinical subtype (estrogen receptor [ER], progesterone receptor [PR], and HER2 status) of human breast tumor cell lines.
